# Supplementary material for: The Arabidopsis U1 snRNP regulates mRNA 3′-end processing
Source: PubMed Central journal article supplement (PMC11489095; doi:10.1038/s41477-024-01796-8), 2024-09-23

### Unprocessed blots for Figure 2B

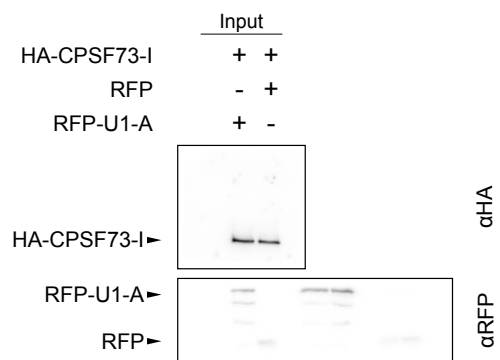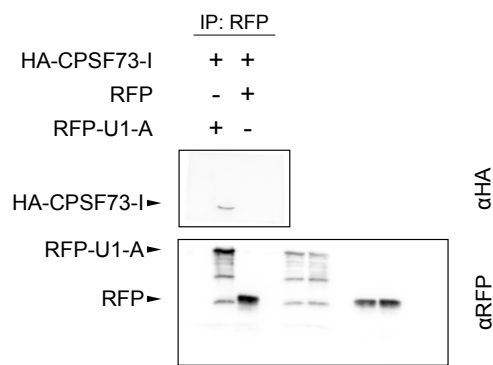

### Unprocessed blots for Figure 2C

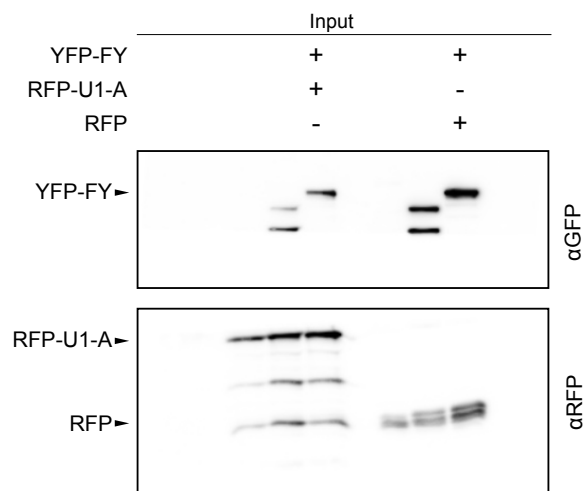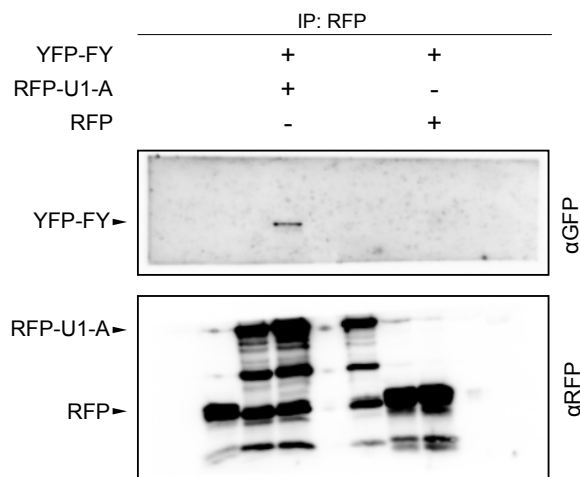

### Unprocessed blots for Figure 2D

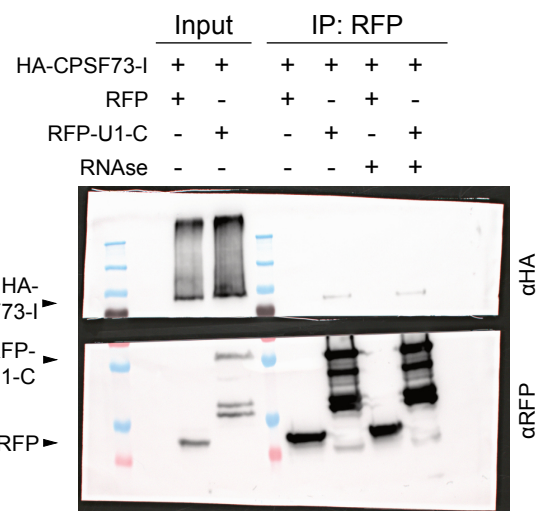

### Unprocessed blots for Figure 2E

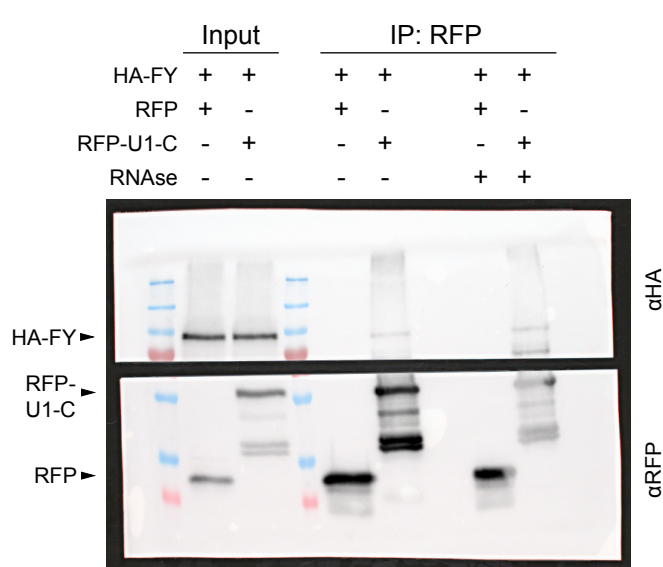

### Unprocessed blots for Figure 2F

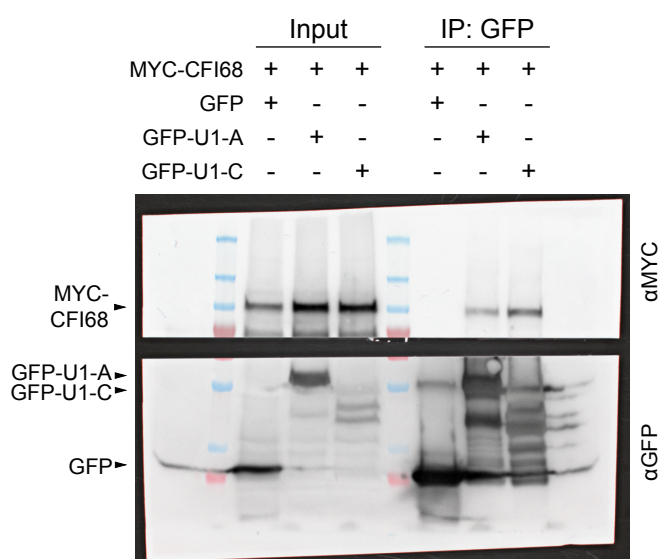

Supplement: 41477_2024_1796_MOESM10_ESM.pdf [file 41477_2024_1796_MOESM10_ESM.pdf]
