# Supplementary material for: The Arabidopsis U1 snRNP regulates mRNA 3′-end processing
Source: PubMed Central journal article supplement (PMC11489095; doi:10.1038/s41477-024-01796-8), 2024-09-23

## Unprocessed blots for Extended Data Figure 1A

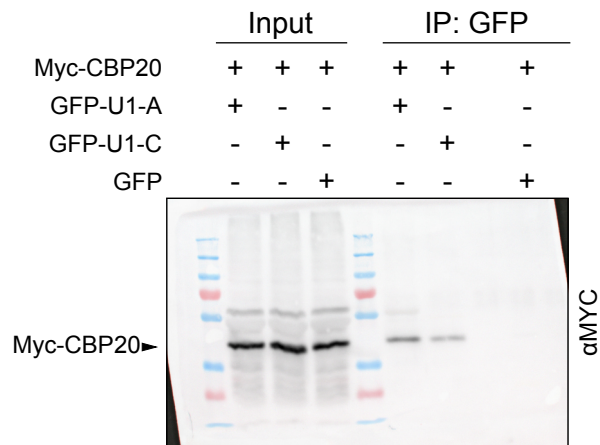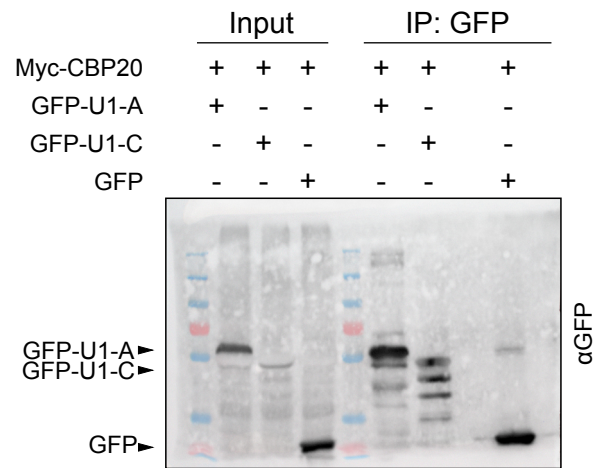

## Unprocessed blots for Extended Data Figure 1B

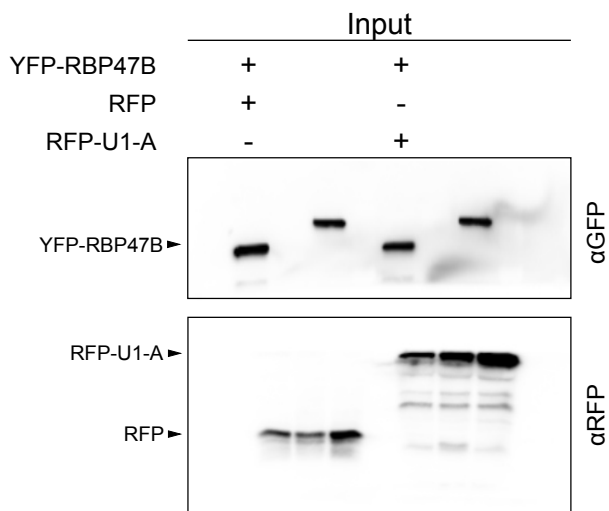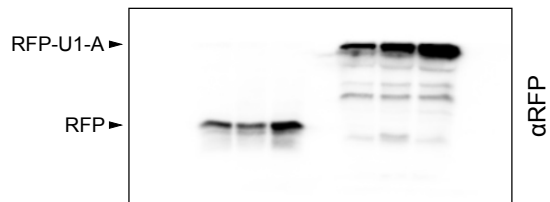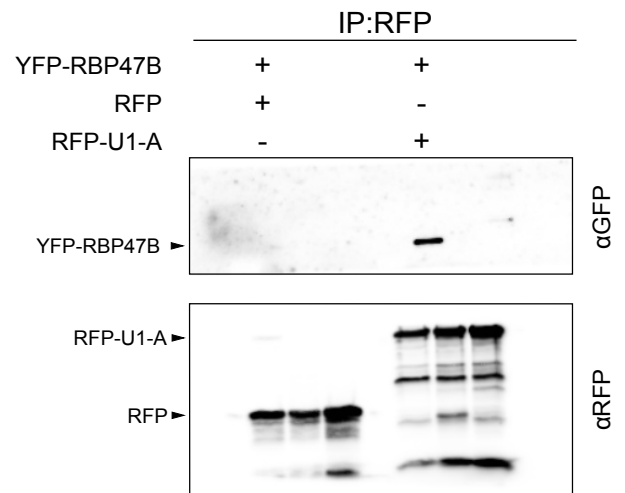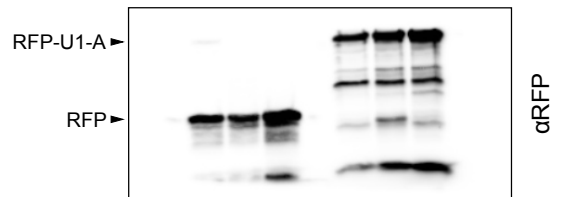

Supplement: 41477_2024_1796_MOESM11_ESM.pdf [file 41477_2024_1796_MOESM11_ESM.pdf]
